# Supplementary material
Source: Springer Nature journal article supplement (https://www.springermedizin.de/resource/supplementary/12888_2010_719_MOESM1_ESM.pdf/9478286)
Supplement: MOESM1 [file 9478286]

# Decision-making context

Information

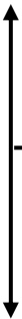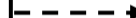

Preferences

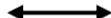

Decision

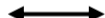

Behavior

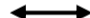

Outcomes

Values (utilities)
